# Supplementary material for: Characterization of Collagen Fibers (I, III, IV) and Elastin of Normal and Neoplastic Canine Prostatic Tissues
Source: MDPI journal article supplement (doi:10.3390/vetsci6010022), 2019-03-02
Supplement: s1 [file s1]

**Table S2.** Histological type of 10 canine prostatic carcinomas, according to Eble et al. 2004 and Palmieri et al. 2014.

| <b>Histologic Type</b>                                            | <b>Case Number</b> |
|-------------------------------------------------------------------|--------------------|
| <b>Single histological pattern</b>                                |                    |
| Cribriform with comedonecrosis                                    | 14, 16             |
| Solid                                                             | 12, 18             |
| Small acinar/ductual                                              | 9, 10              |
| <b>Mixed histological patterns</b>                                |                    |
| Solid, cribriform with comedonecrosis                             | 11, 17             |
| Cribriform with comedonecrosis, solid                             | 13                 |
| Cribriform with comedonecrosis, cribriform without comedonecrosis | 15                 |
